# Supplementary material for: Sleep Deprivation-Induced Changes in Baseline Brain Activity and Vigilant Attention Performance
Source: MDPI journal article supplement (doi:10.3390/brainsci12121690), 2022-12-09
Supplement: s1 [file s1]

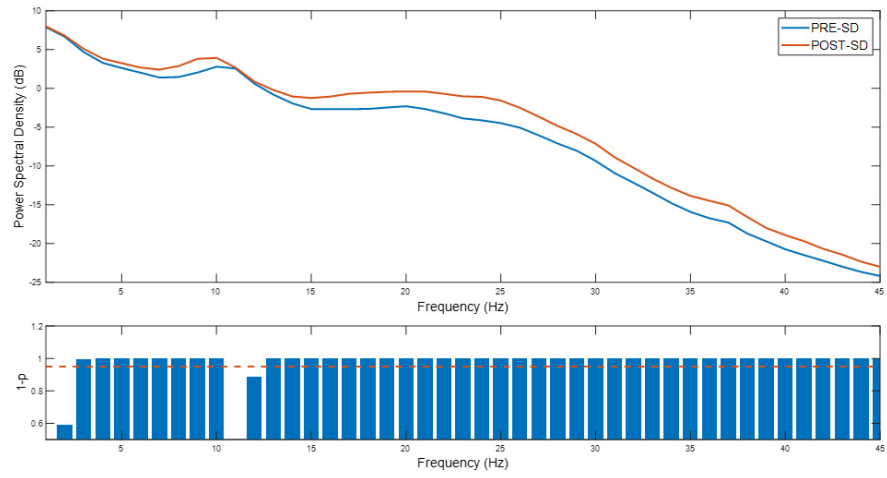

Figure S1: Comparison between pre- and post-SD average values of power spectrum density (PSD). The lower panel shows the statistical significance for each frequency bin (expressed as  $1 - p$ ). The horizontal dotted red line represents the significance threshold set as  $1 - p = 0.95$  ( $p = 0.05$ ).
